# Supplementary material for: BiGAMi: Bi-Objective Genetic Algorithm Fitness Function for Feature Selection on Microbiome Datasets
Source: MDPI journal article supplement (doi:10.3390/mps5030042), 2022-05-23
Supplement: s1 [file s1]

# Supplementary Data

## Task I - Kostic CRC GG97 CLR

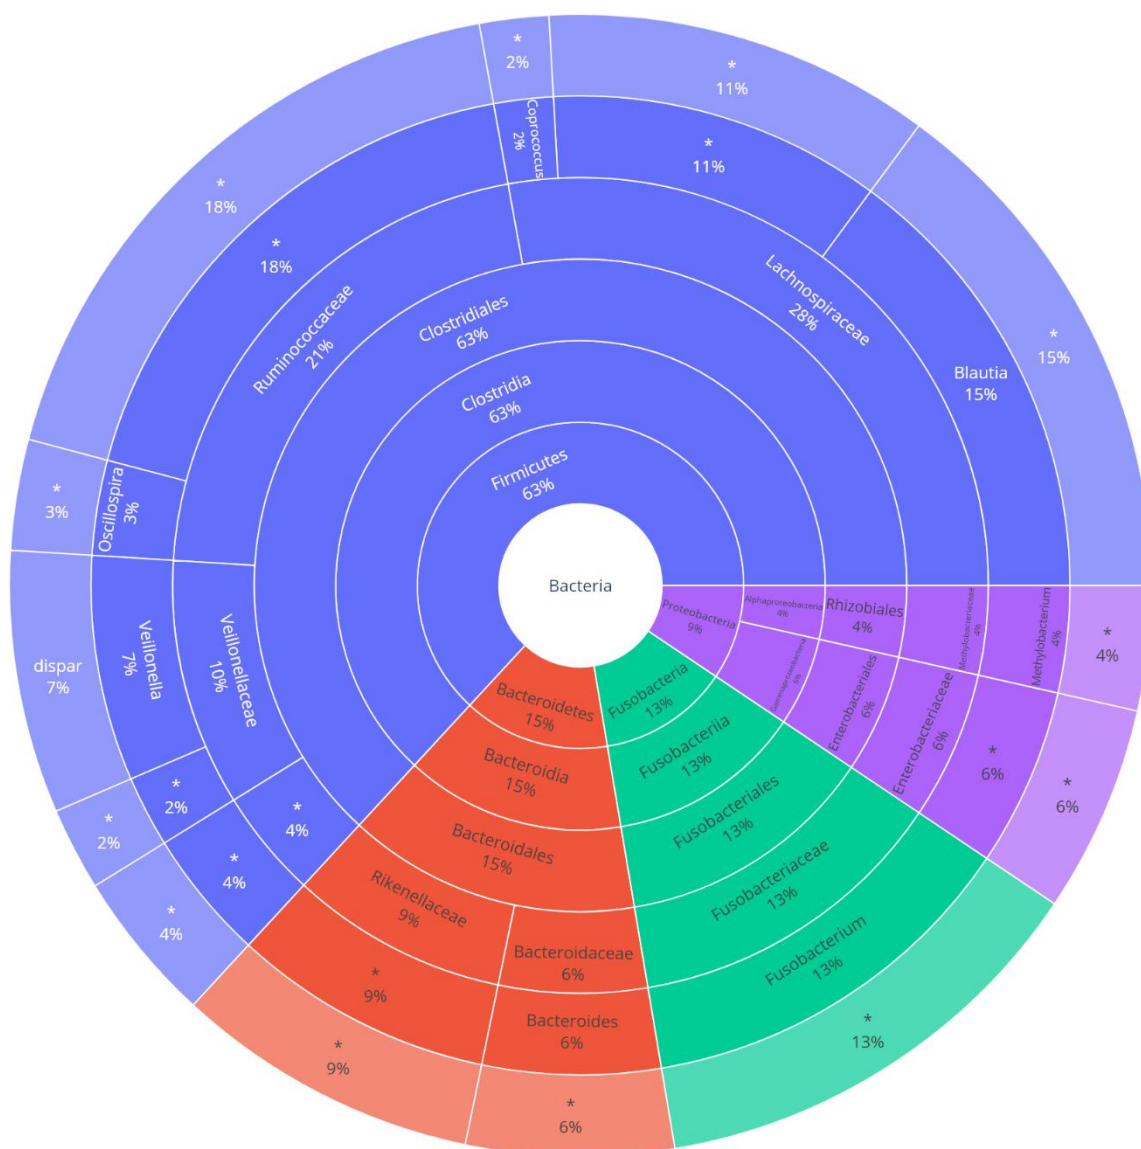

**Figure S1.** Overview of the bacteria selected by the 25 best performing GA individuals for all classification task I: Kostic Colorectal Cancer Healthy/Tumor GG97 CLR.

## Task II - Ravel Vaginosis RefSeq CLR

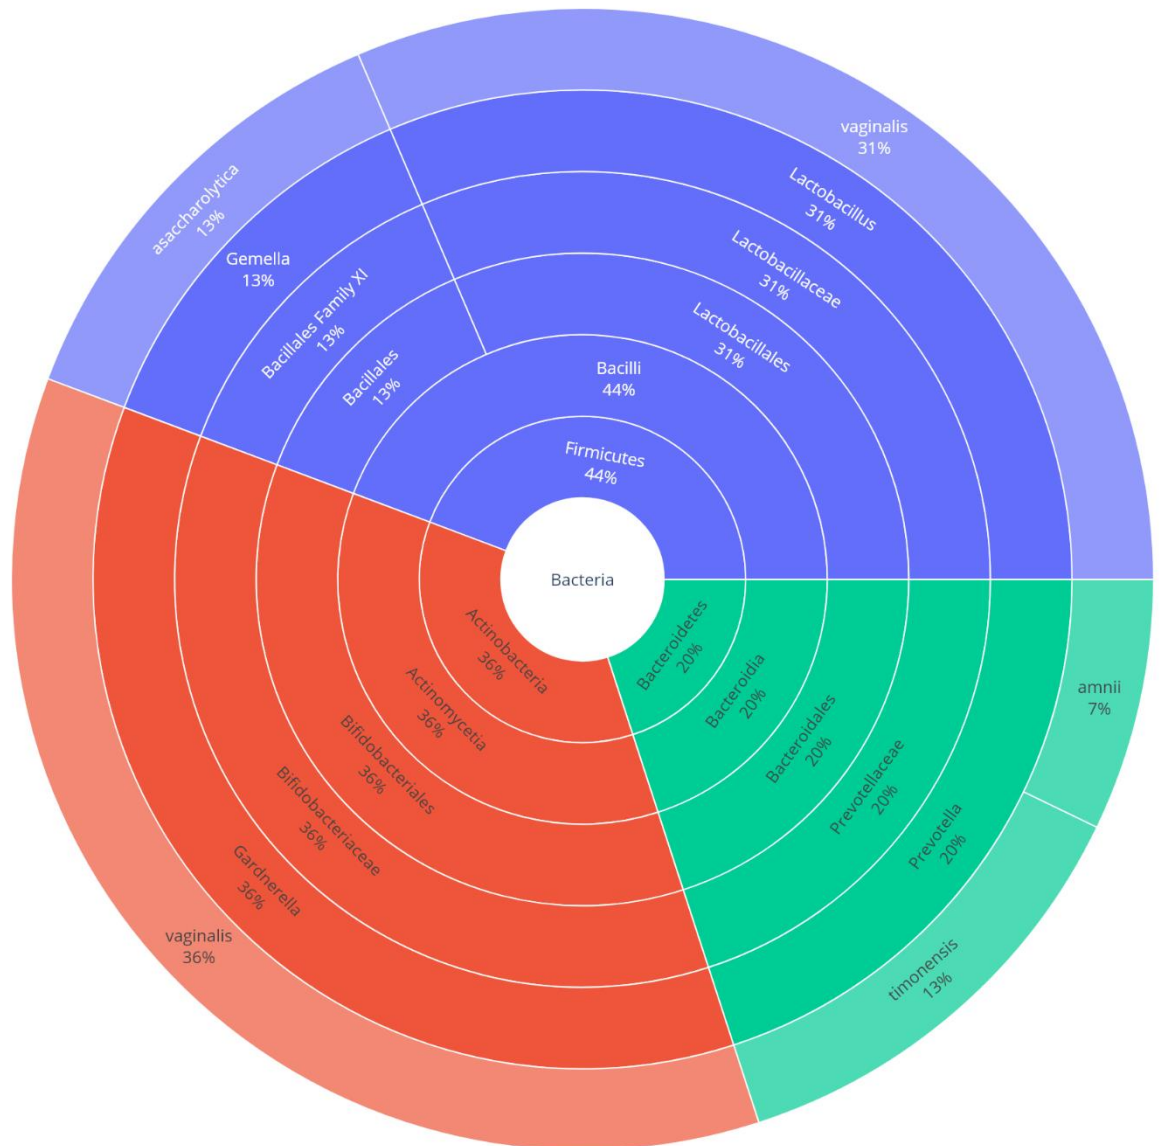

**Figure S2.** Overview of the bacteria selected by the 25 best performing GA individuals for all classification task II: Ravel Vaginal Nugent Category RefSeq CLR.

## Task III - Ravel BW RefSeq Rel

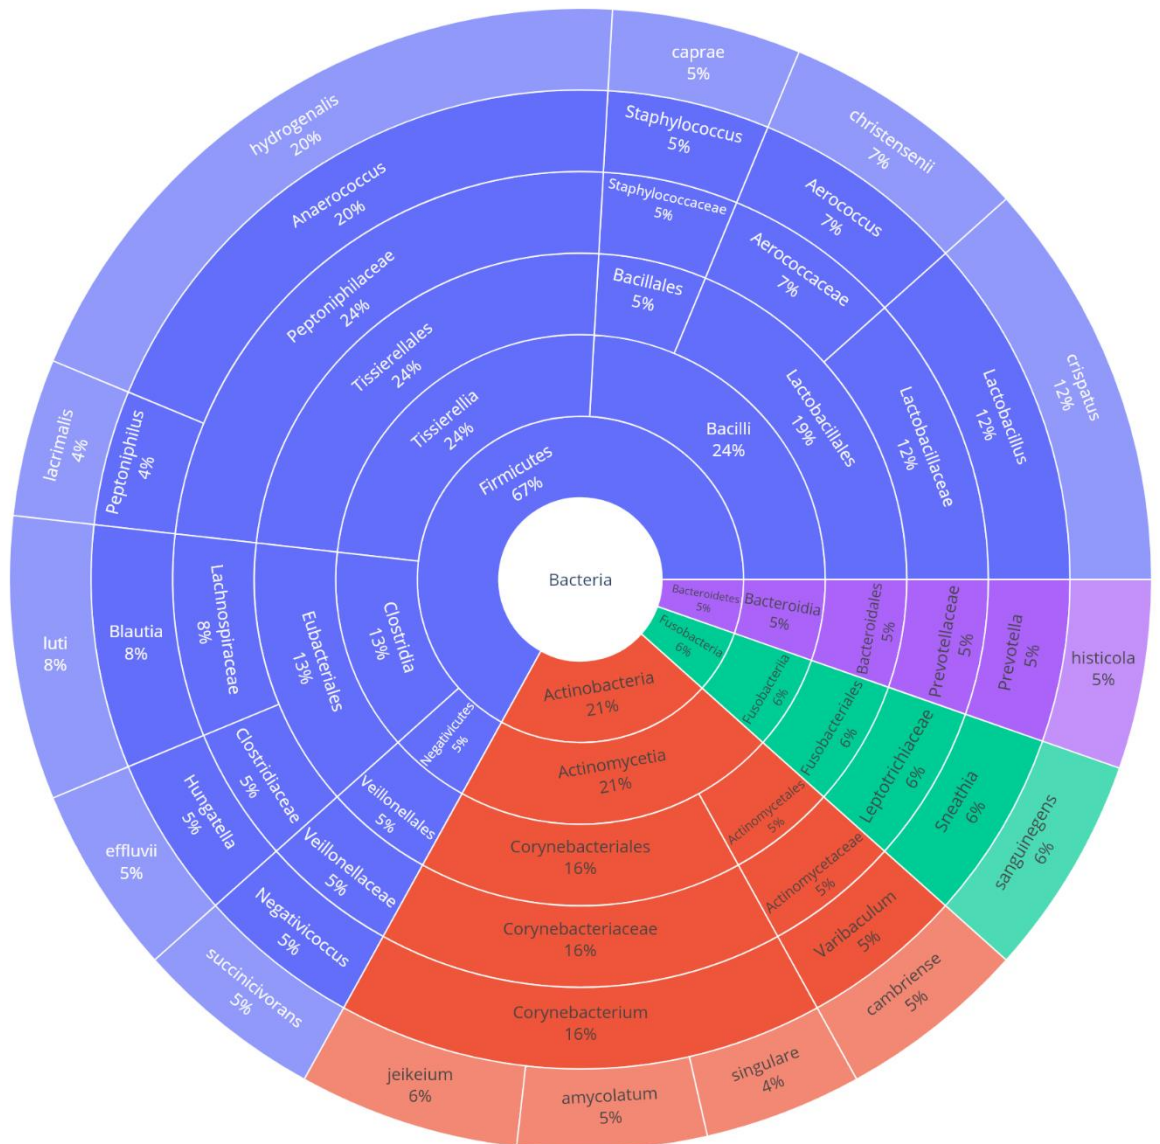

**Figure S3.** Overview of the bacteria selected by the 25 best performing GA individuals for all classification task II: Ravel Vaginal Black/White RefSeq RefSeq CLR.

Task IV - Qin Cirrhosis RefSeq CLR

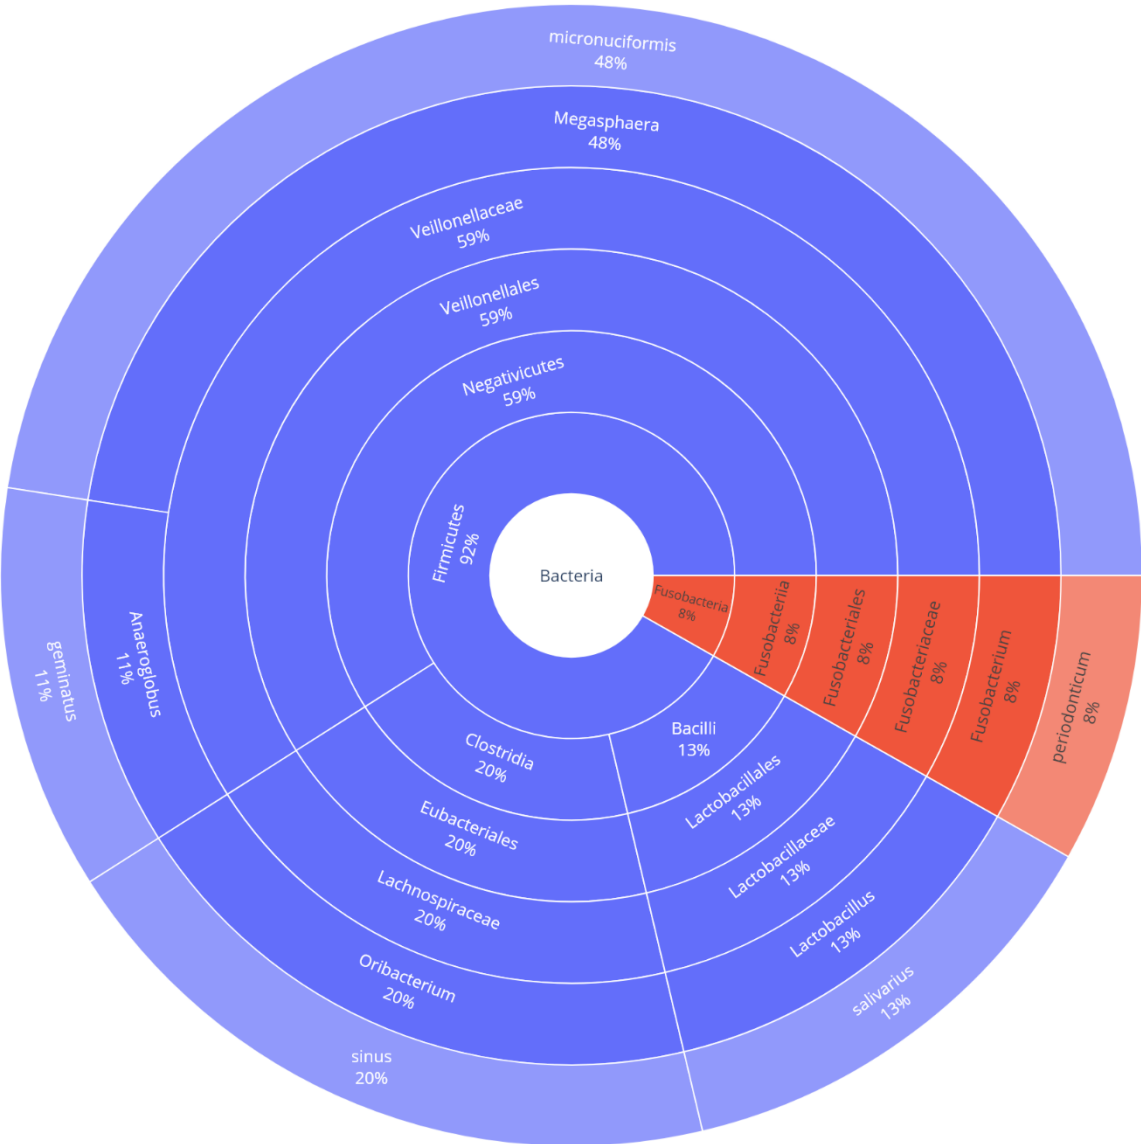

**Figure S4.** Overview of the bacteria selected by the 25 best performing GA individuals for all classification task IV: Qin Cirrhosis RefSeq CLR.
